# Supplementary material for: New Biotinylated GHK and Related Copper(II) Complex: Antioxidant and Antiglycant Properties In Vitro against Neurodegenerative Disorders
Source: MDPI journal article supplement (doi:10.3390/molecules28186724), 2023-09-20
Supplement: s1 [file s1]

## **SUPPORTING INFORMATION**

### **New biotinylated GHK and related copper(II) complex: antioxidant and antiglycant properties against neurodegenerative disorders**

Rita Tosto<sup>1</sup>, Graziella Vecchio<sup>2</sup> and Francesco Bellia<sup>1\*</sup>

<sup>1</sup> *Institute of Crystallography, CNR, P. Gaifami 18, 95126 – Catania (Italy)*

<sup>2</sup> *Department of Chemical Sciences, University of Catania, A. Doria 6, 95125 – Catania (Italy)*

\* corresponding author: francesco.bellia@cnr.it

**A**

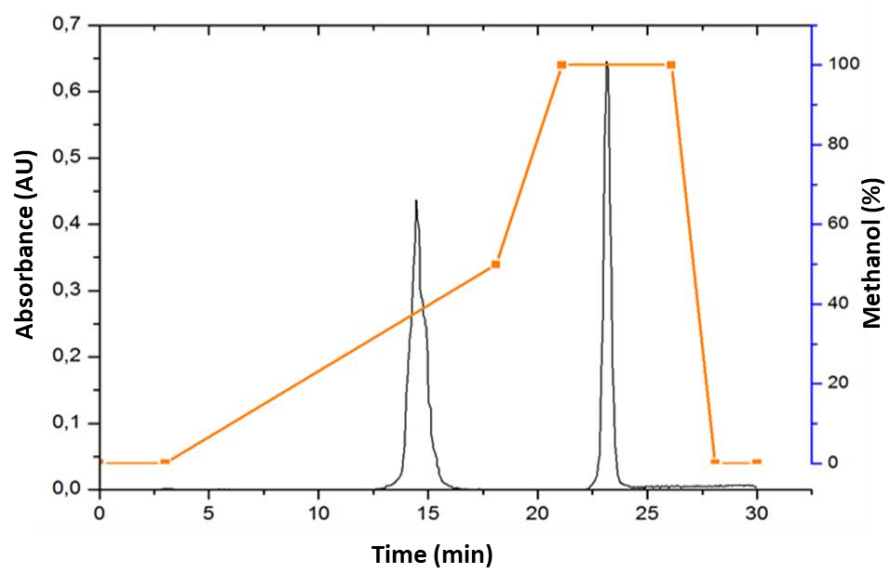

**B**

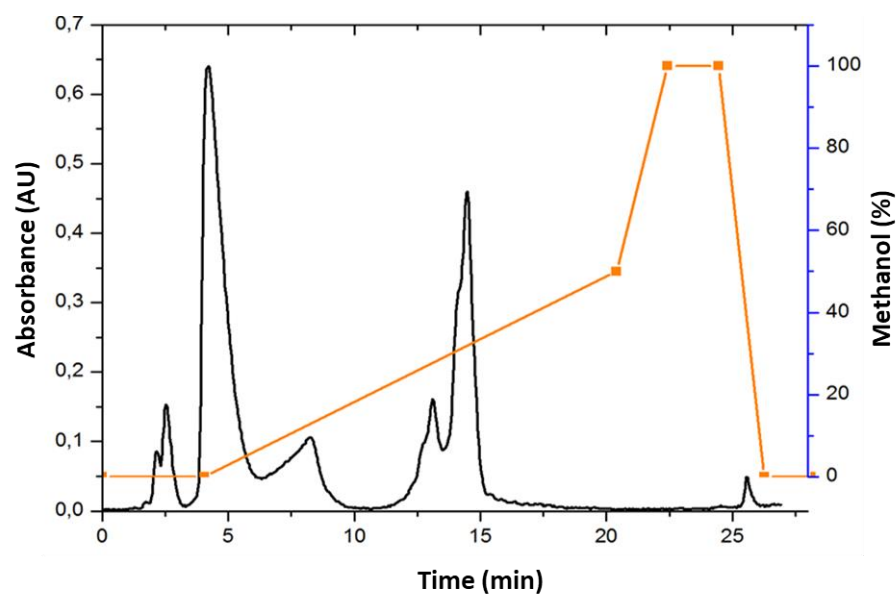

**Figure S1.** Chromatograms related to purification of (A) GHK-diBOC and (B) BioGHK

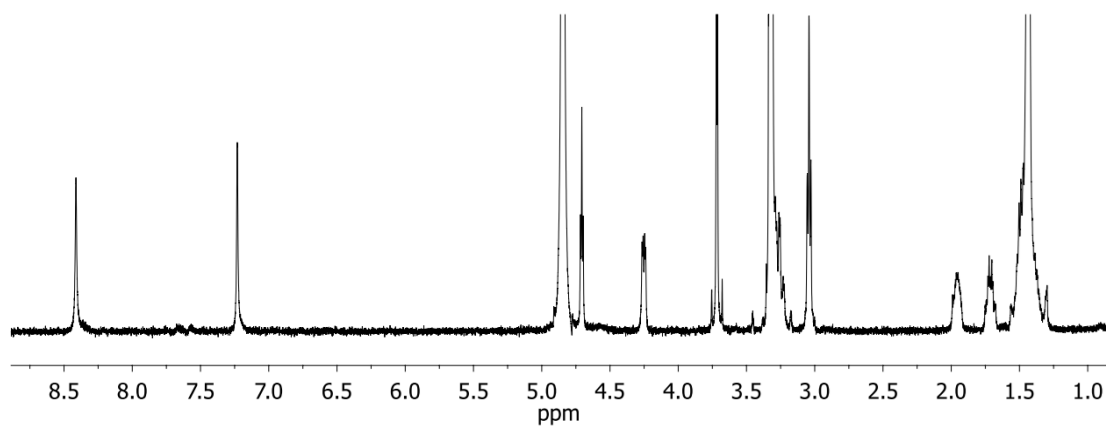

**Figure S2.**  $^1\text{H}$  NMR spectrum of GHK-di-BOC (CDOD, 500 MHz).

**A**

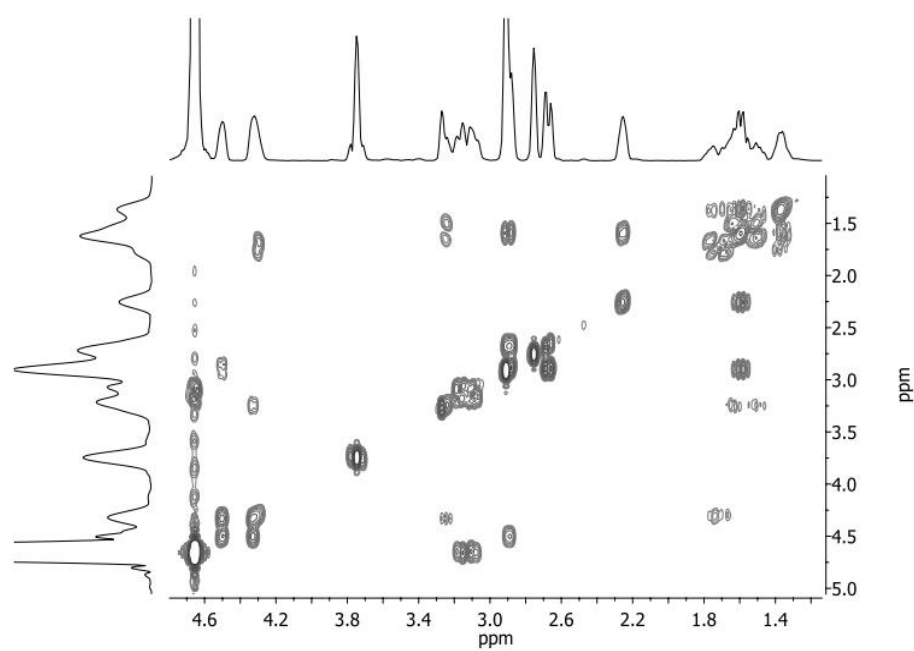

**B**

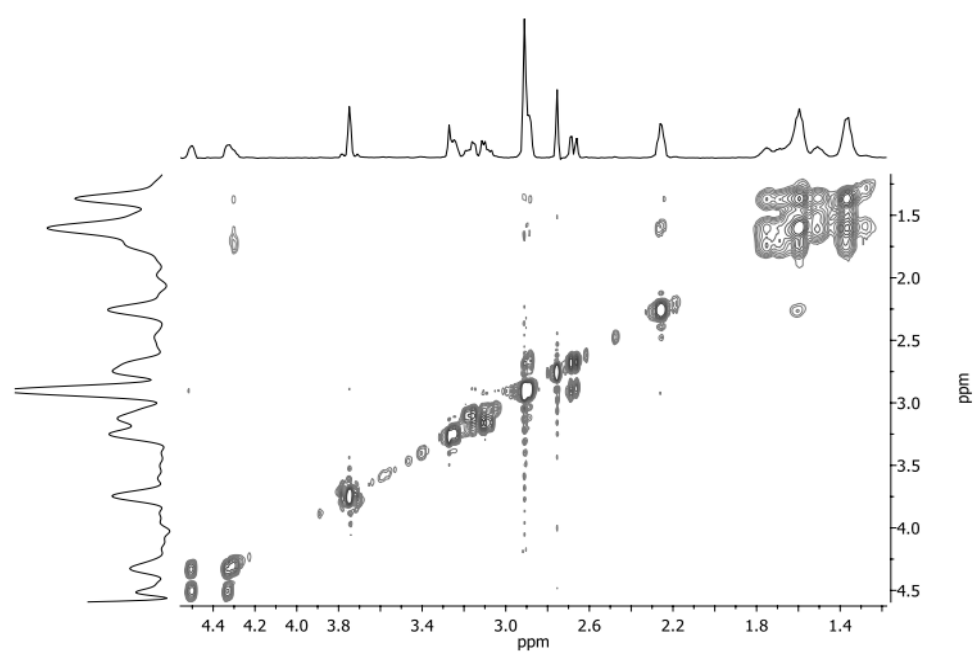

**Figure S3.** (A) COSY and (B) TOCSY spectra of BioGHK.

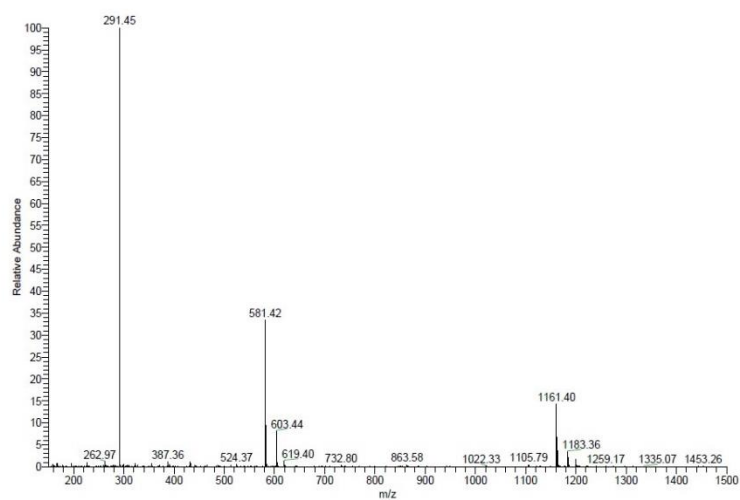

**Figure S4.** ESI-MS spectrum of BioGHK.

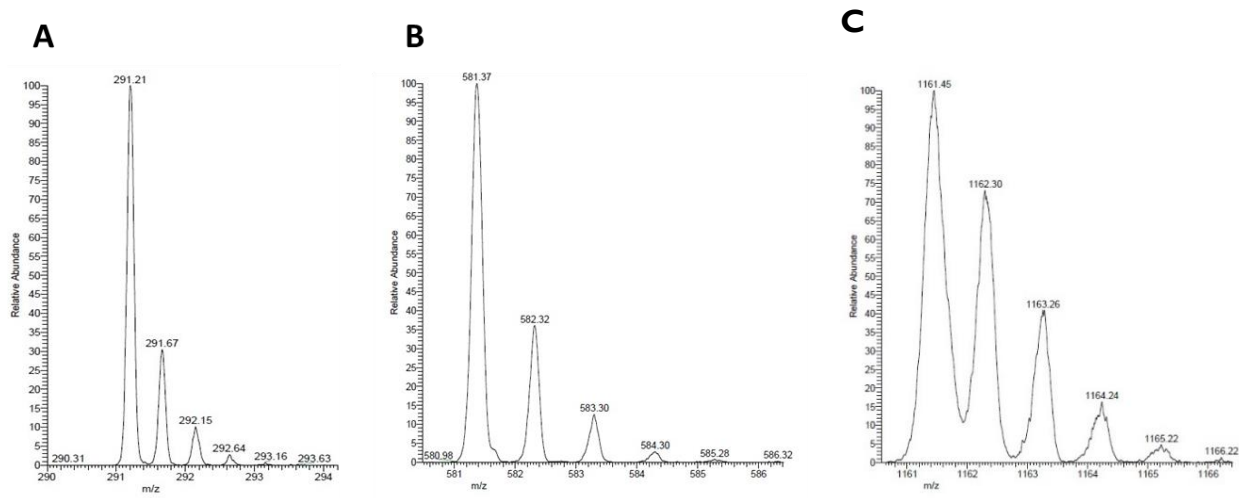

**Figure S5.** Zoom Scan of the signals relating to the species (A)  $[M+2H]^{2+}$ , (B)  $[M+H]^+$  and (C)  $[2M+H]^+$  (M = GHK).

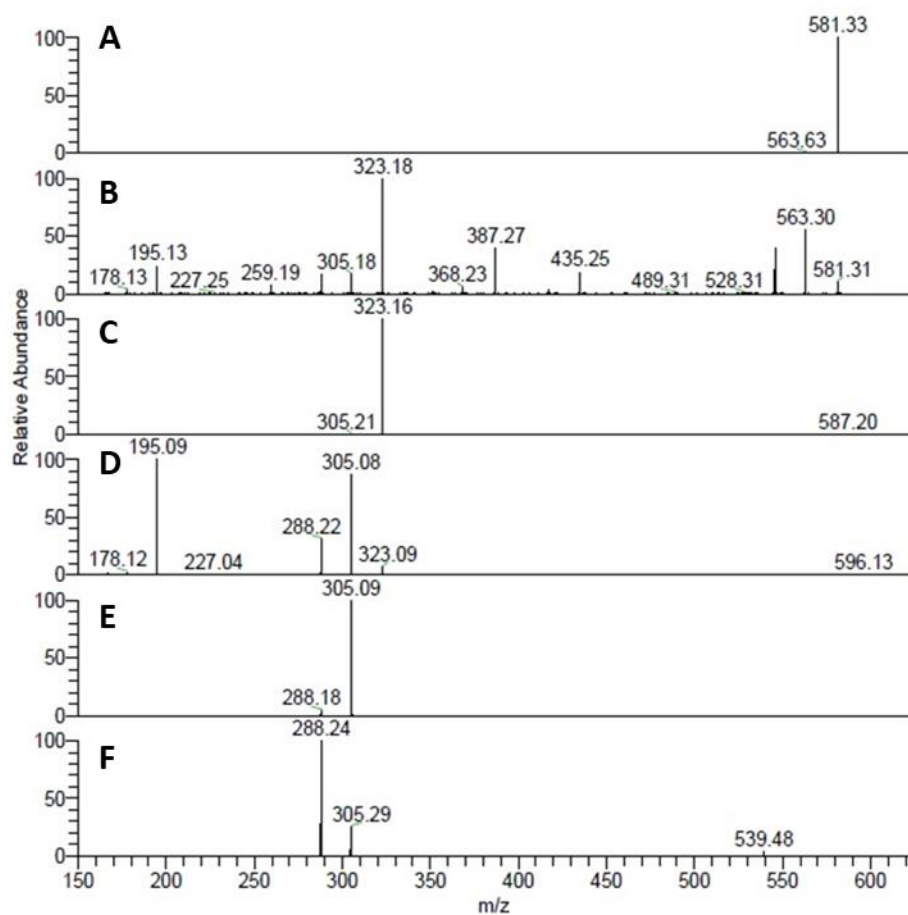

**Figure S6.** Multidimensional fragmentation of BioGHK, whose the selected mono-charged protonated adduct (A:  $m/z$  581.3, C:  $m/z$  323.2, E:  $m/z$  305.8) were fragmented to produce different signals (B: MS2@581.3, D: MS3@323.2, F: MS4@ 305.8)

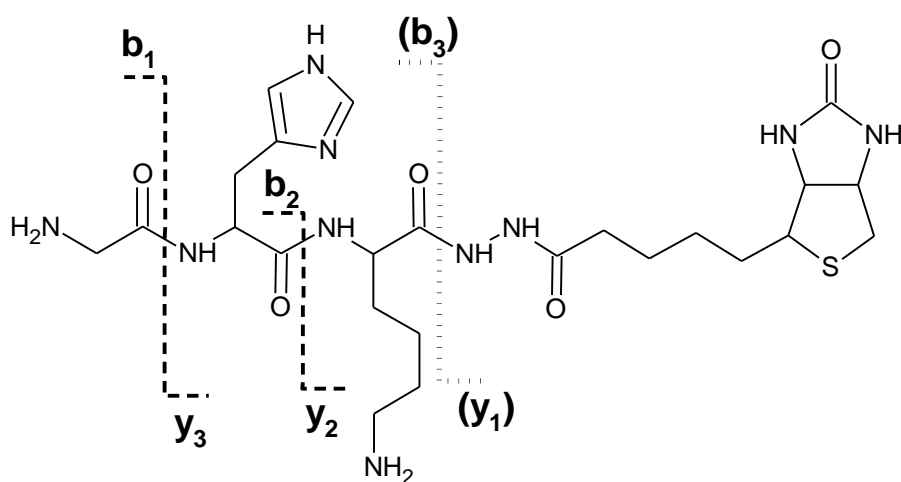

**Figure S7.** ESI-MS theoretical fragmentation scheme of BioGHK.

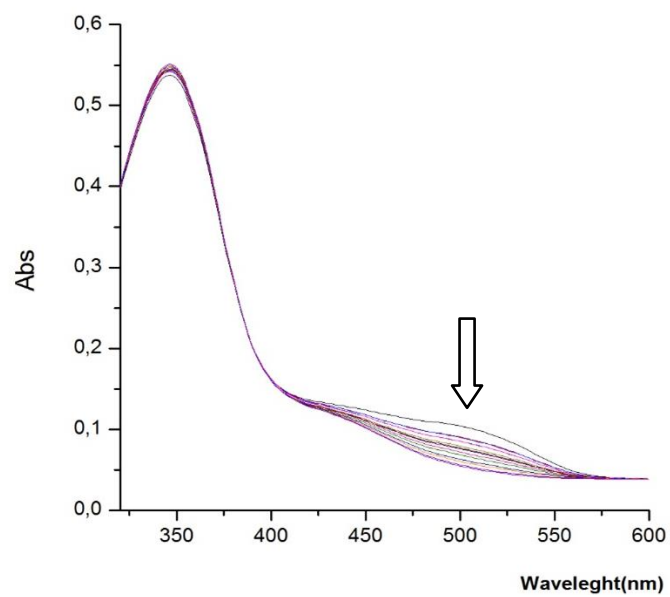

**Figure S8.** Spectrophotometric titration of Sav-HABA with BioGHK. The arrow shows the decrease trend of the absorption band centered at 500 nm.

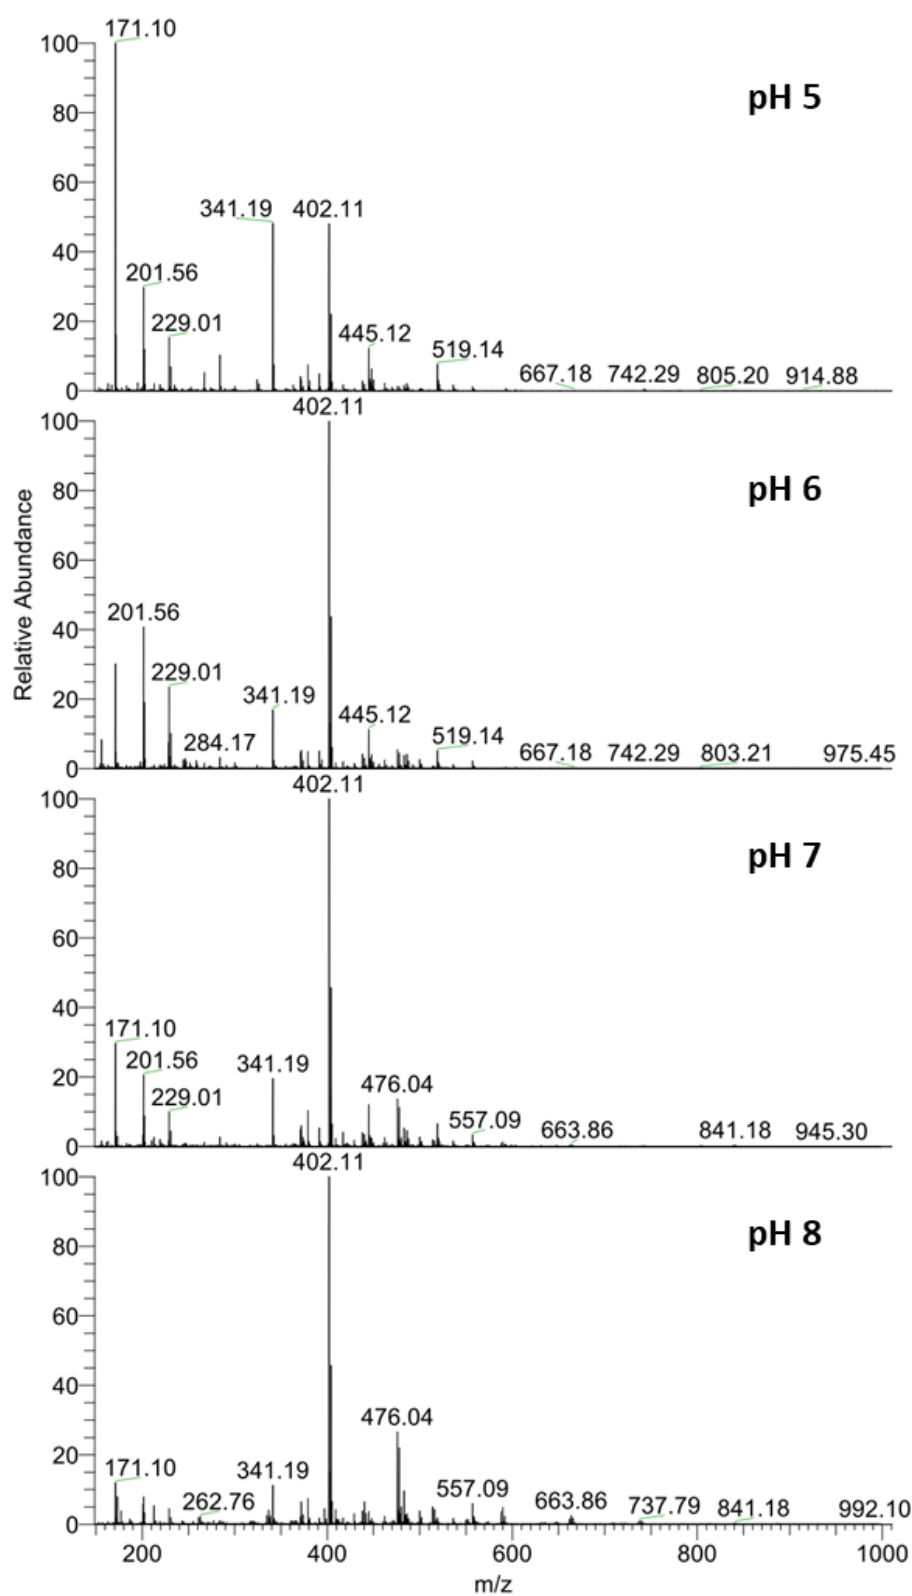

**Figure S9.** ESI-MS spectra of Cu(II)-GHK complex at various pH values (5-8).



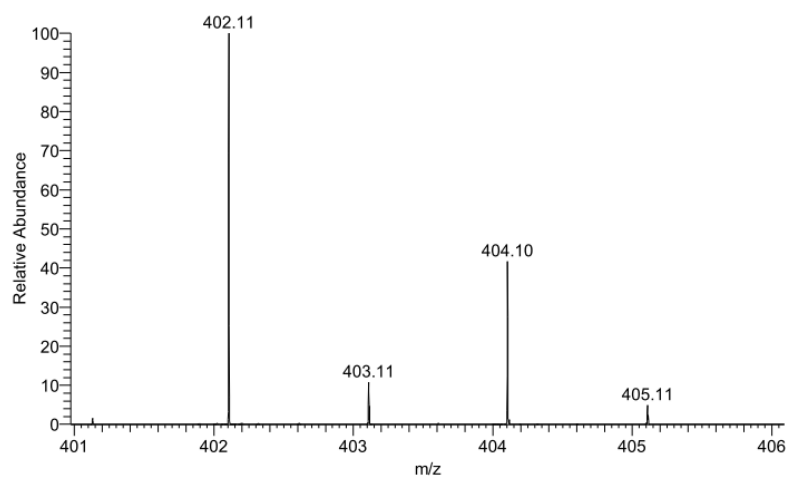

**Figure S10.** *Zoom scan* of the main complex species of the Cu-GHK system at pH 7.

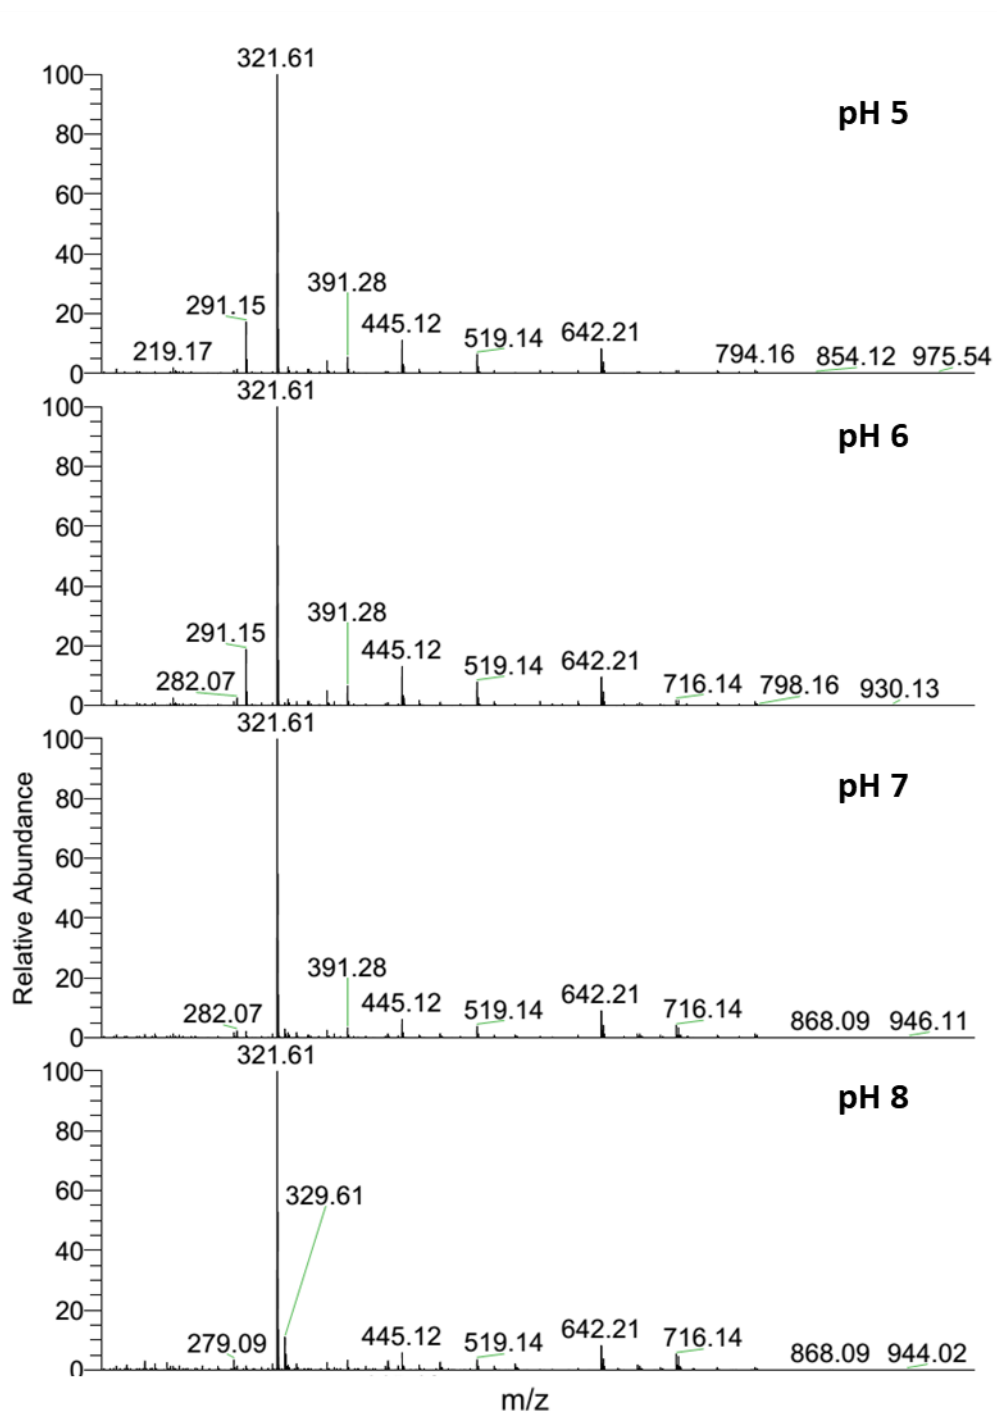

**Figure S11.** ESI-MS spectra of Cu(II):BioGHK 1:1 at various pH values (5-8).

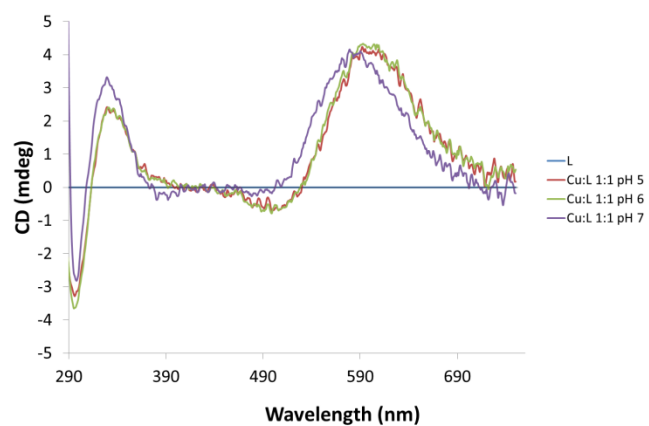

A

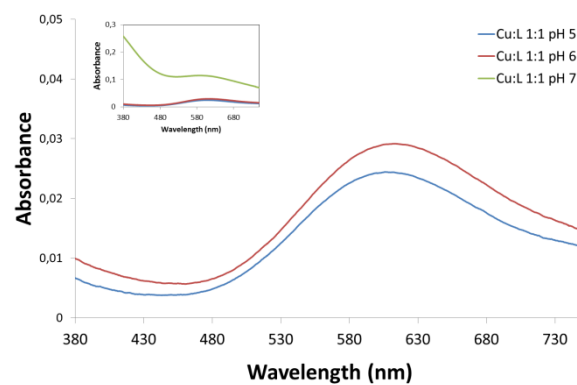

B

**Figure S12.** A) CD spectra of the Cu(II) complex (L = BioGHK); B) absorbance of the BioGHK/Cu(II) complex in the Vis region.

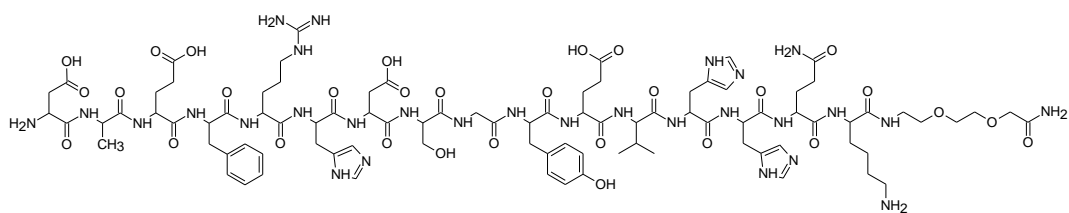

**Figure S13.** A $\beta_{1-16}$  amino acid sequence with a PEG residue.

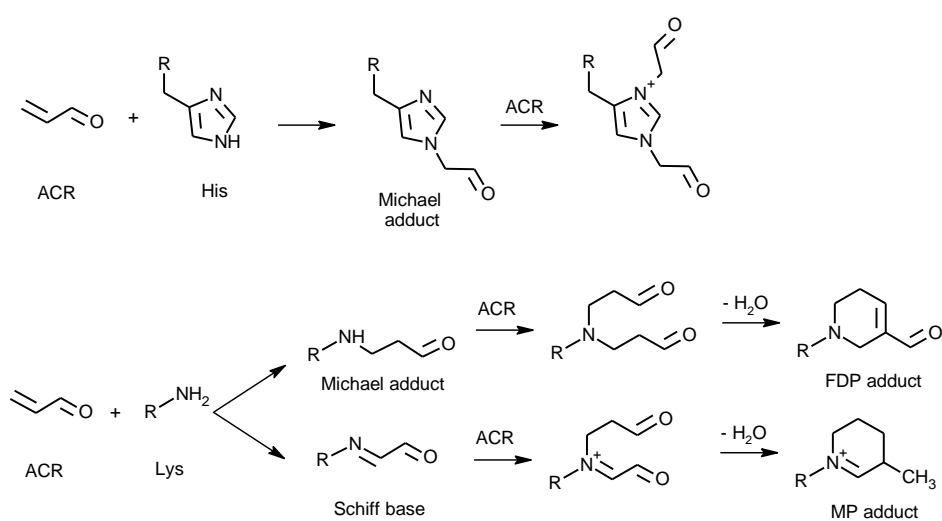

**Figure S14.** Main adducts between ACR and the histidine and lysine side-chains.

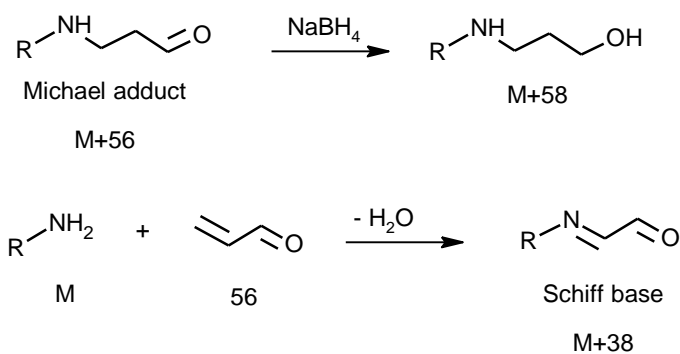

**Figure S15.** Reduction of the aldehyde group of the Michael adduct by NaBH<sub>4</sub> (upper) and formation of the Schiff base (lower).

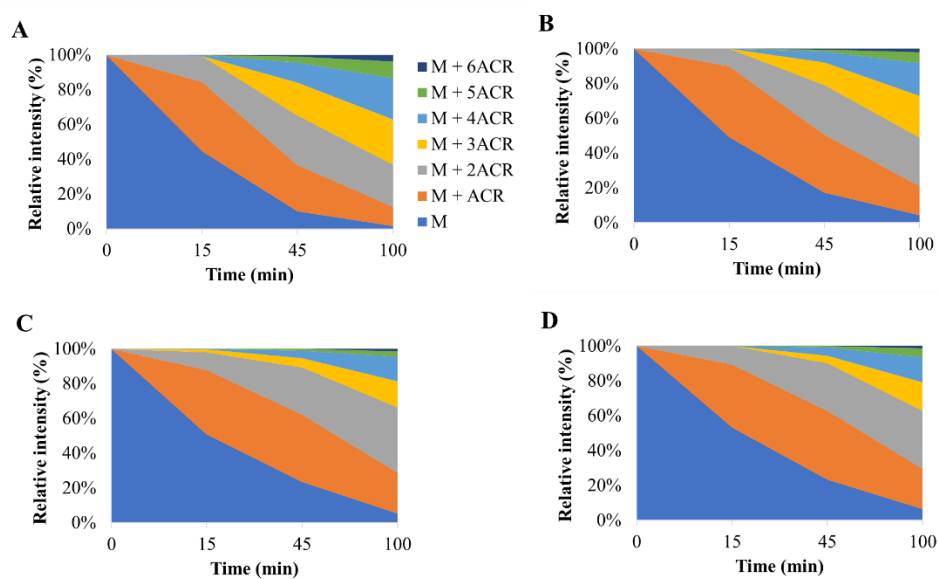

**Figure S16.** Relative intensity of all species detected by MALDI mass spectrometry following the reaction between A $\beta$  and ACR in the absence (A) and in the presence of GHK, the A $\beta$ :GHK molar ratio being 1:1 (B), 1:2 (C) and 1:3 (D)

**A**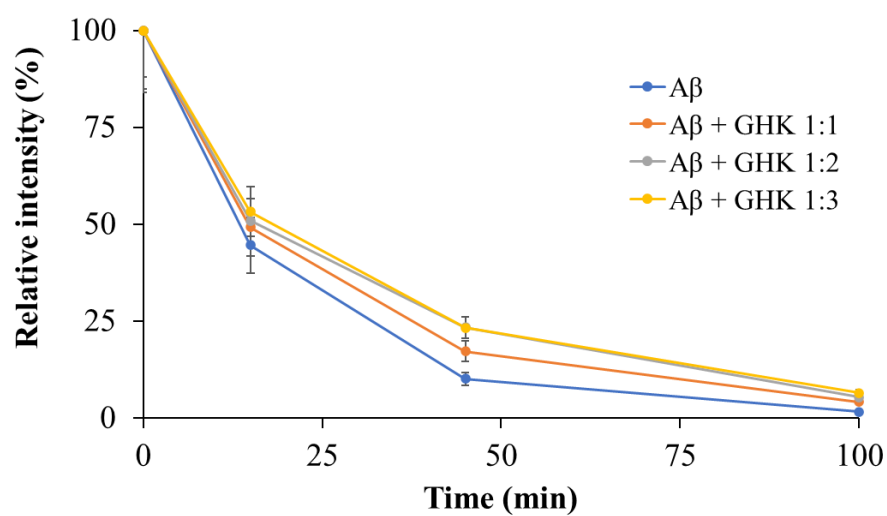**B**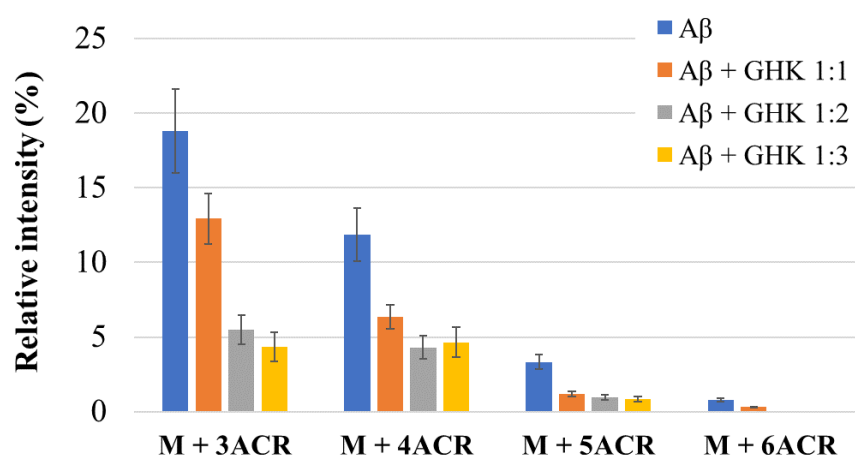

**Figure S17.** (A) Time-dependent amount of non-carbonylated A $\beta$  in the absence and in the presence of increasing concentrations of GHK. (B) Relative intensity of the carbonylated species of A $\beta$  at increasing concentrations of GHK, after 45 minutes of reaction.

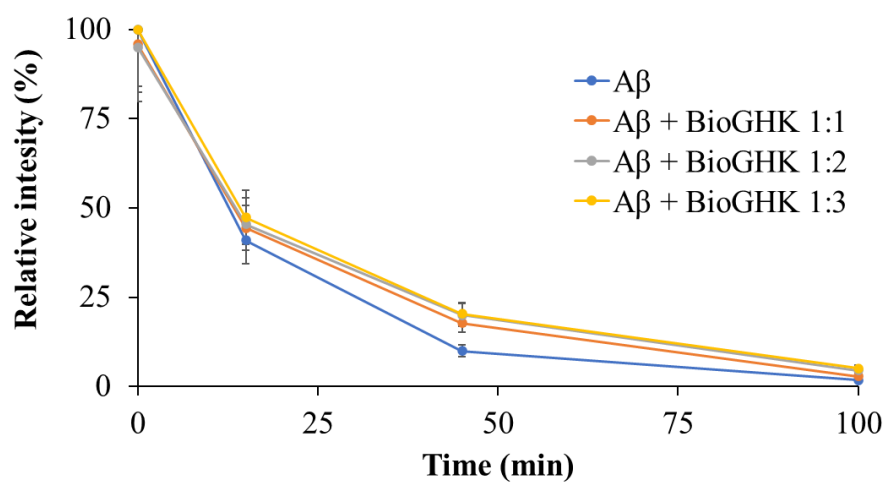

**Figure S18:** Variation of non-carbonylated A $\beta$  over time in the absence and in the presence of increasing concentrations of BioGHK.

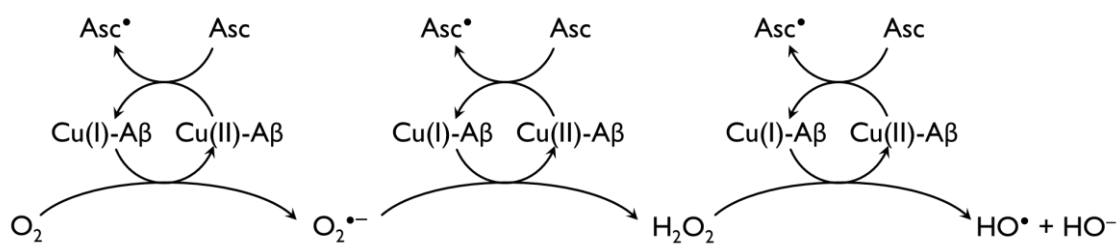

**Figure S19.** ROS formation determined by the Cu-Aβ complex, in the presence of ascorbate.

**A**

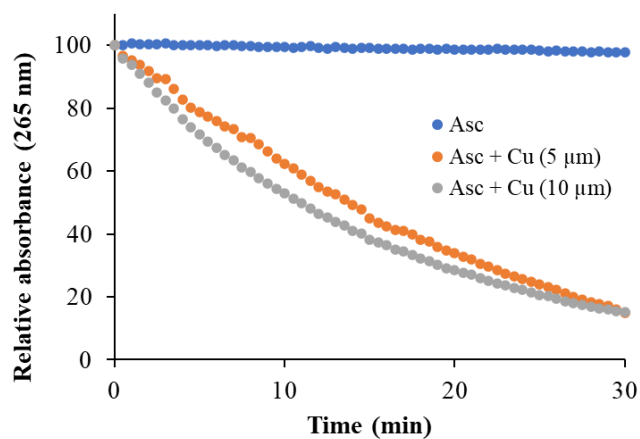

**B**

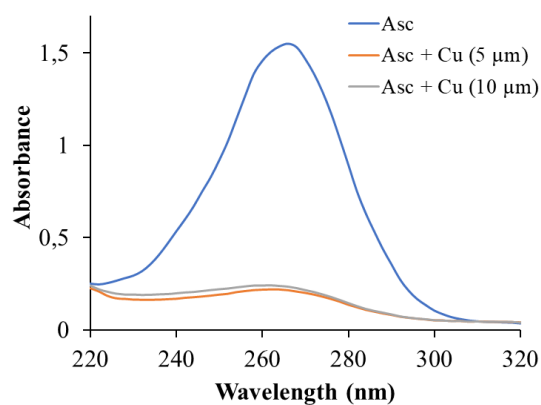

**Figure S20.** (A) Variation of the absorption of Asc (200 μM) at 265 nm, in the absence and presence of  $Cu^{2+}$  (5 and 10 μM). (B) Absorption spectrum of Asc after incubation for 30 min in the absence and in the presence of  $Cu^{2+}$  (5 and 10 μM).



**A**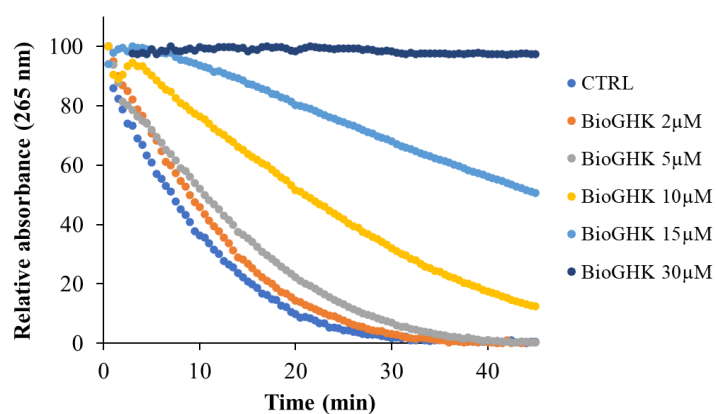**B**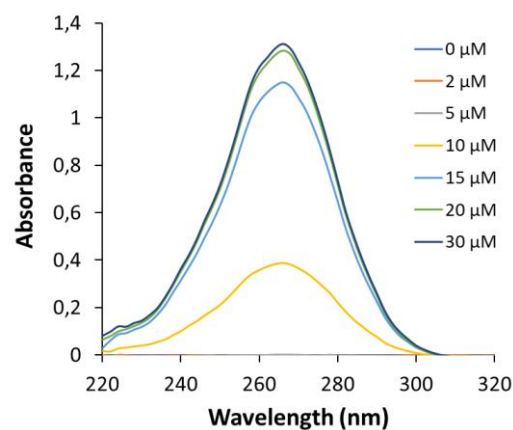

**Figure S21.** (A) Asc oxidation kinetics induced by the  $\text{Cu}^{2+}$ -A $\beta$  complex in the absence and in the presence of GHK (0-30  $\mu\text{M}$ ). (B) Absorption spectra of ascorbate (200  $\mu\text{M}$ ) after incubation for 45 min, in the absence and in the presence of GHK (0-30  $\mu\text{M}$ ).

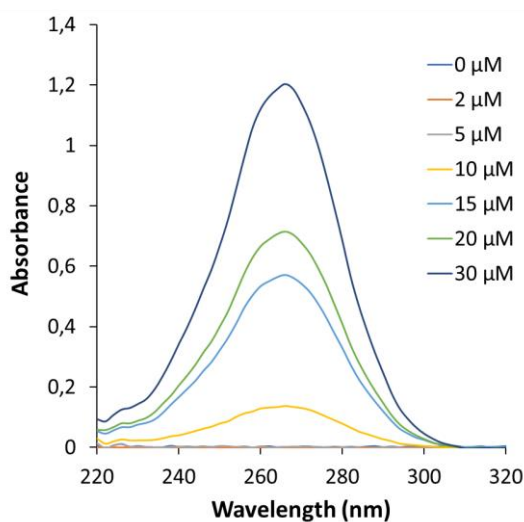

**Figure S22.** Absorption spectra of ascorbate (200  $\mu\text{M}$ ) after incubation for 45 min, in the absence and in the presence of BioGHK (0-30  $\mu\text{M}$ ).

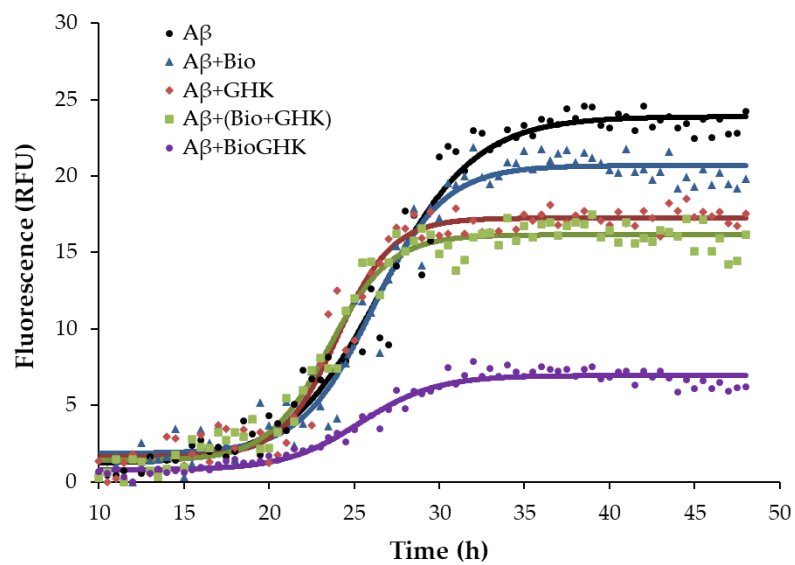

**Figure S23.** Kinetic profiles of A $\beta_{1-42}$  aggregation alone (A $\beta$ , 20  $\mu$ M), incubated with biotin (Bio), GHK, an equimolar mixture of Bio and GHK (Bio+GHK), and BioGHK, the A $\beta$ /compound molar ratio being 1:1.

**A**

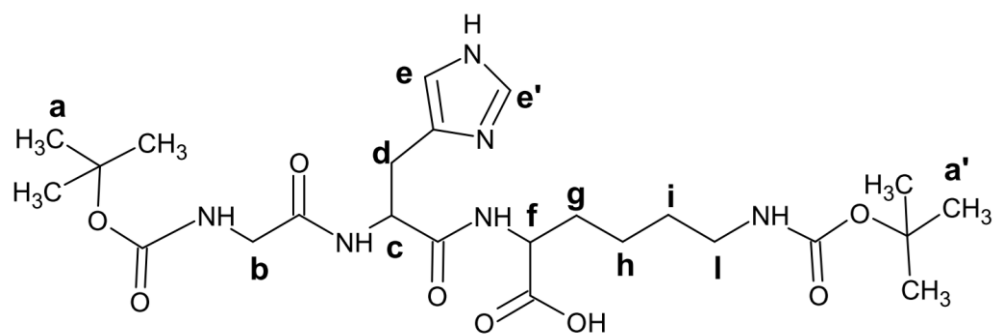

**B**

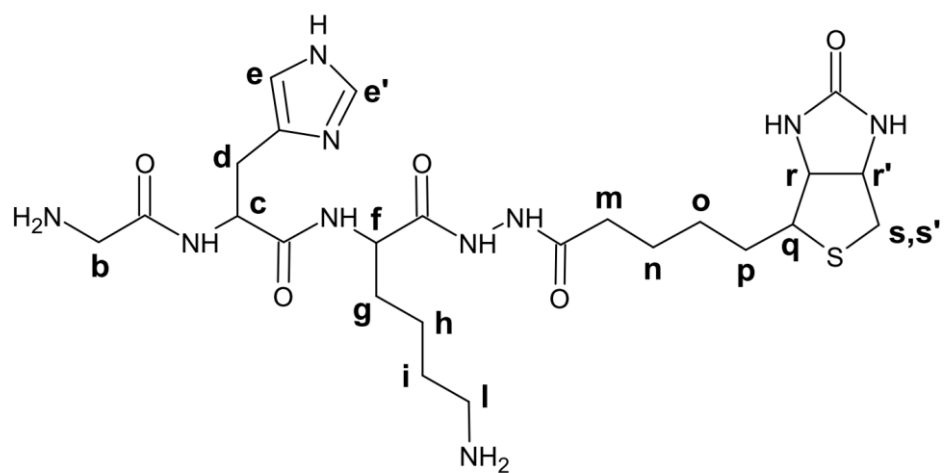

**Figure S24.** Proton assignment by NMR of GHK-di-BOC (A) and BioGHK (B).
